# Supplementary material for: Suppression of Exosomal PD-L1 Induces Systemic Anti-tumor Immunity and Memory
Source: PubMed Central journal article supplement (PMC6499401; doi:10.1016/j.cell.2019.02.016), 2019-04-04
Supplement: NIHMS1526616-supplement-1.pdf [file NIHMS1526616-supplement-1.pdf]

**Cell, Volume 177**

**Supplemental Information**

**Suppression of Exosomal PD-L1 Induces**

**Systemic Anti-tumor Immunity and Memory**

**Mauro Poggio, Tianyi Hu, Chien-Chun Pai, Brandon Chu, Cassandra D. Belair, Anthony Chang, Elizabeth Montabana, Ursula E. Lang, Qi Fu, Lawrence Fong, and Robert Blueloch**

**Supplemental Table 1: T cell Panel  
(Related to STAR Methods)**

**Surface Staining**

| Marker    | Laser    | Color           | Channel | Company               | Cat. No.                   |
|-----------|----------|-----------------|---------|-----------------------|----------------------------|
| CD4       | Violet C | BV711           | V710/50 | Biolegend             | 100447<br>RRID:AB_2564586  |
| CD8       | Violet E | BV605           | V610/20 | Biolegend             | 100744<br>RRID:AB_2562609  |
| CD45      | Violet G | BV510           | V515/20 | Biolegend             | 103138<br>RRID:AB_2563061  |
| *Tim-3    | Blue B   | PerCp-<br>Cy5.5 | B710/50 | Biolegend             | 119718<br>RRID:AB_2571935  |
| CD3e      | UV G     | BUV395          | U379/28 | BD Biosciences        | 563565                     |
| PD-1      | Violet D | BV650           | V450/50 | BD Biosciences        | 135215<br>RRID:AB_10696422 |
| Live/Dead | UV E     | Live/dead       | U515/30 | Biolegend             | 423107                     |
| Fc        |          |                 |         | Tonbo<br>Bioseciences | 70-0161                    |

**Intracellular  
Staining**

|       |          |       |         |                |                              |
|-------|----------|-------|---------|----------------|------------------------------|
| Ki67  | Violet H | BV480 | V470/15 | BD Biosciences | 566109                       |
| GzB   | Red B    | AF700 | R730/45 | BD Biosciences | 560213<br>RRID:AB_1645453    |
| Foxp3 | Blue D   | FITC  | B515/20 | eBiosciences   | 11-5773-82<br>RRID:AB_465243 |

**Surface Staining**

**FMO**

| Marker | Laser    | Color | Channel | Company   | Cat. No.                  |
|--------|----------|-------|---------|-----------|---------------------------|
| CD4    | Violet C | BV711 | V710/50 | Biolegend | 100447<br>RRID:AB_2564586 |
| CD8    | Violet E | BV605 | V610/20 | Biolegend | 100744<br>RRID:AB_2562609 |
| CD45   | Violet G | BV510 | V515/20 | Biolegend | 103138<br>RRID:AB_2563061 |

|                                   |                 |                    |         |                       |                              |
|-----------------------------------|-----------------|--------------------|---------|-----------------------|------------------------------|
| *Tim-3                            | <b>Blue B</b>   | <b>PerCp-Cy5.5</b> | B710/50 | Biolegend             | 119718<br>RRID:AB_2571935    |
| CD3e                              | <b>UV G</b>     | <b>BUV395</b>      | U379/28 | BD Biosciences        | 563565                       |
| PD-1                              | <b>Violet D</b> | <b>BV650</b>       | V450/50 | BD Biosciences        | 135215<br>RRID:AB_10696422   |
| Live/Dead                         | <b>UV E</b>     | <b>Live/dead</b>   | U515/30 | Biolegend             | 423107                       |
| Fc                                |                 |                    |         | Tonbo<br>Bioseciences | 70-0161                      |
| <b>Intracellular Staining FMO</b> |                 |                    |         |                       |                              |
| Ki67                              | <b>Violet D</b> | <b>BV650</b>       | V660/20 | BD Biosciences        | 566109                       |
| GzB                               | <b>Red B</b>    | <b>AF700</b>       | R730/45 | BD Biosciences        | 560213<br>RRID:AB_1645453    |
| Foxp3                             | <b>Blue D</b>   | <b>FITC</b>        | B515/20 | eBiosciences          | 11-5773-82<br>RRID:AB_465243 |
